# Supplementary material
Source: publisher site journal article supplement (https://www.spandidos-publications.com/6772/downloadSupplementary)
Supplement: Supplementary file 1 [file downloadSupplementary]

## Sheet: Supplementary_Table_SVIII
Table SVIII. List of genes from the brown module.
Gene symbol	Module color	GS.Strep	P-value GS.Strep	MM.brown	P-value MM.brown
MGAT4C	Brown	0.901117	4.83e-12	0.867778	2.61e-10
SVOP	Brown	0.887896	2.73e-11	0.802994	5.45e-08
GOLGA6L6	Brown	0.828901	8.44e-09	0.849083	1.57e-09
MAGEB6	Brown	0.807216	4.1e-08	0.921341	2e-13
ZNF730	Brown	0.802982	5.46e-08	0.801583	5.99e-08
WASH6P	Brown	0.801991	5.83e-08	0.878773	7.99e-11
SLC17A7	Brown	0.800459	6.45e-08	0.943998	1.68e-15
SRSF8	Brown	0.760473	6.89e-07	0.824853	1.15e-08
LRRC69	Brown	0.727272	3.58e-06	0.887695	2.8e-11
ZNF610	Brown	0.724742	4.01e-06	0.806208	4.39e-08
FRRS1L	Brown	0.724155	4.12e-06	0.85289	1.11e-09
LRP2	Brown	0.698897	1.22e-05	0.896081	9.6e-12
CECR2	Brown	0.688153	1.88e-05	0.882501	5.21e-11
CARD18	Brown	0.677357	2.85e-05	0.979979	7.05e-22
SOHLH2	Brown	0.675583	3.04e-05	0.971375	1.19e-19
SSX1	Brown	0.671188	3.58e-05	0.838652	3.85e-09
C2orf80	Brown	0.664218	4.61e-05	0.979245	1.18e-21
RASGEF1C	Brown	0.66169	5.05e-05	0.974055	2.91e-20
SLC39A8	Brown	0.65915	5.52e-05	0.830555	7.41e-09
CABP7	Brown	0.65607	6.15e-05	0.874464	1.29e-10
AMHR2	Brown	0.654442	6.5e-05	0.876275	1.06e-10
ADCYAP1R1	Brown	0.653722	6.66e-05	0.935215	1.31e-14
CPLX2	Brown	0.649942	7.58e-05	0.942497	2.44e-15
GRIA4	Brown	0.649333	7.74e-05	0.939915	4.54e-15
GRID2	Brown	0.644333	9.16e-05	0.961077	9.6e-18
LAMB4	Brown	0.639384	0.000107856	0.886957	3.06e-11
ADAMTS20	Brown	0.637398	0.000115073	0.986559	2.28e-24
ZNF704	Brown	0.633551	0.000130283	0.809115	3.6e-08
USP26	Brown	0.633479	0.000130587	0.871197	1.83e-10
SDK2	Brown	0.632143	0.000136284	0.861936	4.7e-10
MCMDC2	Brown	0.629823	0.000146711	0.854166	9.87e-10
CLEC2L	Brown	0.624821	0.000171643	0.982755	8.24e-23
UCP1	Brown	0.623679	0.000177836	0.962638	5.36e-18
CERT1	Brown	0.621664	0.000189253	0.925508	9.33e-14
EPHA5	Brown	0.619671	0.000201186	0.895438	1.05e-11
DCAF8L1	Brown	0.618691	0.000207292	0.958637	2.28e-17
CSNK1E	Brown	0.614866	0.000232734	0.834806	5.28e-09
PRKAR2B	Brown	0.613915	0.000239471	0.897356	8.09e-12
MAGEA8	Brown	0.610019	0.000268932	0.983712	3.62e-23
CFHR4	Brown	0.610008	0.000269023	0.968793	4.1e-19
ZNF676	Brown	0.609355	0.000274263	0.81881	1.81e-08
POTEM	Brown	0.608495	0.000281299	0.97945	1.03e-21
POTEH	Brown	0.607705	0.000287912	0.985166	9.43e-24
TRMT10A	Brown	0.607033	0.00029364	0.842881	2.7e-09
XAGE3	Brown	0.606896	0.000294823	0.932922	2.14e-14
CSPG5	Brown	0.606825	0.000295438	0.880994	6.2e-11
LRIT2	Brown	0.603551	0.000324974	0.85964	5.88e-10
SLC16A12	Brown	0.600848	0.000351312	0.927961	5.83e-14
PRKAG3	Brown	0.600752	0.000352274	0.979073	1.33e-21
SPRY3	Brown	0.600275	0.000357124	0.954289	9.45e-17
PLPPR3	Brown	0.59856	0.000375049	0.984127	2.5e-23
NCALD	Brown	0.597606	0.000385364	0.920619	2.27e-13
SLC5A12	Brown	0.597537	0.000386119	0.980477	4.91e-22
GJB7	Brown	0.597009	0.000391943	0.984176	2.39e-23
TMEM65	Brown	0.596403	0.000398725	0.819945	1.66e-08
POTEI	Brown	0.596206	0.000400951	0.854169	9.87e-10
NIPSNAP2	Brown	0.593222	0.000436056	0.806059	4.44e-08
FRMD7	Brown	0.593206	0.000436246	0.984231	2.27e-23
STK3	Brown	0.592152	0.000449285	0.881709	5.71e-11
TRIM43B	Brown	0.590425	0.000471388	0.98354	4.22e-23
PEG10	Brown	0.589587	0.000482461	0.93058	3.47e-14
OR56A3	Brown	0.587675	0.000508561	0.925493	9.35e-14
TPD52L3	Brown	0.585364	0.000541792	0.982558	9.7e-23
MKX	Brown	0.584916	0.000548442	0.801565	6e-08
ZNF66	Brown	0.584645	0.00055251	0.869312	2.23e-10
MYO1H	Brown	0.584558	0.000553818	0.974654	2.08e-20
CAVIN4	Brown	0.582877	0.000579659	0.989444	6.97e-26
CHRND	Brown	0.582534	0.00058507	0.986284	3.05e-24
PRSS37	Brown	0.579001	0.000643348	0.98281	7.87e-23
INTS8	Brown	0.578193	0.000657367	0.870029	2.07e-10
FRG2	Brown	0.577943	0.000661752	0.95672	4.35e-17
RXFP1	Brown	0.577524	0.000669176	0.959355	1.78e-17
TRIM43	Brown	0.575618	0.000703868	0.981658	2e-22
LTO1	Brown	0.574962	0.000716171	0.981149	2.97e-22
MYO18B	Brown	0.574635	0.000722381	0.980184	6.08e-22
ESR2	Brown	0.574424	0.000726408	0.940731	3.74e-15
NKX1-2	Brown	0.57333	0.000747589	0.979069	1.34e-21
CCND1	Brown	0.572381	0.000766421	0.95573	6e-17
AC022415.2	Brown	0.572122	0.00077164	0.80761	3.99e-08
BSND	Brown	0.570162	0.000812074	0.96263	5.37e-18
BRDT	Brown	0.568224	0.000853885	0.981883	1.68e-22
WNT9B	Brown	0.567912	0.000860791	0.932482	2.35e-14
UNC45B	Brown	0.56763	0.000867056	0.929828	4.04e-14
SUSD3	Brown	0.567581	0.000868166	0.846629	1.95e-09
PEX2	Brown	0.567274	0.000875041	0.867852	2.59e-10
GAP43	Brown	0.567149	0.000877864	0.959822	1.51e-17
FGF4	Brown	0.56667	0.000888762	0.982058	1.46e-22
AC000120.2	Brown	0.565732	0.000910408	0.981888	1.67e-22
GAGE2A	Brown	0.565732	0.000910408	0.981888	1.67e-22
KDM4F	Brown	0.565732	0.000910408	0.981888	1.67e-22
PPP1R3A	Brown	0.565732	0.000910408	0.981888	1.67e-22
TP53TG3	Brown	0.565732	0.000910408	0.981888	1.67e-22
DEFA5	Brown	0.565694	0.000911291	0.981897	1.66e-22
FGF19	Brown	0.565519	0.000915374	0.981395	2.46e-22
HAND1	Brown	0.565453	0.000916925	0.981996	1.53e-22
ALPG	Brown	0.565267	0.000921297	0.983987	2.84e-23
KDM4E	Brown	0.565251	0.000921685	0.98169	1.95e-22
PREX1	Brown	0.565244	0.000921844	0.982427	1.08e-22
PGPEP1L	Brown	0.565222	0.000922363	0.982758	8.22e-23
SLC6A2	Brown	0.564809	0.000932143	0.982868	7.5e-23
FTHL17	Brown	0.564769	0.00093311	0.982745	8.31e-23
FGF3	Brown	0.564552	0.00093829	0.966961	9.26e-19
PRSS56	Brown	0.564382	0.000942359	0.983229	5.52e-23
PNMA5	Brown	0.564058	0.000950175	0.983587	4.05e-23
COX8C	Brown	0.563413	0.00096592	0.983728	3.57e-23
ZNF722P	Brown	0.563333	0.000967877	0.983164	5.84e-23
POTEG	Brown	0.563273	0.000969352	0.983653	3.82e-23
INSL6	Brown	0.562029	0.00100045	0.980492	4.86e-22
SPZ1	Brown	0.561965	0.00100207	0.980152	6.22e-22
DEFA6	Brown	0.56146	0.00101497	0.97951	9.84e-22
BSN	Brown	0.561418	0.00101604	0.963991	3.16e-18
ATP1A2	Brown	0.560944	0.00102826	0.98034	5.43e-22
TUBA3E	Brown	0.560867	0.00103026	0.981204	2.84e-22
SSX5	Brown	0.56079	0.00103228	0.980612	4.44e-22
PRAMEF19	Brown	0.56063	0.00103644	0.977489	3.8e-21
ATP6V1C1	Brown	0.560164	0.00104867	0.864421	3.68e-10
METTL24	Brown	0.560052	0.00105163	0.94657	8.64e-16
MMP26	Brown	0.559681	0.00106151	0.987122	1.23e-24
SEPTIN14	Brown	0.559263	0.00107272	0.981286	2.67e-22
POTEE	Brown	0.558317	0.00109846	0.820332	1.62e-08
SSX4B	Brown	0.557903	0.00110988	0.983189	5.71e-23
MTMR7	Brown	0.557754	0.00111401	0.840394	3.33e-09
ZDHHC19	Brown	0.557679	0.00111611	0.97462	2.12e-20
CCDC3	Brown	0.55727	0.00112757	0.983466	4.5e-23
CDHR1	Brown	0.55723	0.00112871	0.924876	1.05e-13
ERICH3	Brown	0.555882	0.00116721	0.955112	7.3e-17
CELA1	Brown	0.55576	0.00117076	0.970197	2.12e-19
GIPC3	Brown	0.555329	0.00118334	0.840932	3.18e-09
CPNE3	Brown	0.555128	0.00118924	0.822173	1.41e-08
CHRM5	Brown	0.554751	0.00120041	0.9749	1.81e-20
SYCP1	Brown	0.554105	0.00121973	0.972021	8.59e-20
RFPL4AL1	Brown	0.553668	0.00123296	0.971936	8.97e-20
GRIK1	Brown	0.553617	0.00123453	0.965566	1.67e-18
IDH1	Brown	0.552653	0.00126418	0.968166	5.45e-19
MAGEC2	Brown	0.552422	0.00127138	0.979587	9.32e-22
ZSCAN5B	Brown	0.5524	0.00127208	0.980242	5.83e-22
FRMPD4	Brown	0.551944	0.00128638	0.978753	1.66e-21
AZU1	Brown	0.551596	0.0012974	0.956942	4.04e-17
MAGEA2	Brown	0.551349	0.00130531	0.974152	2.76e-20
SHISA8	Brown	0.551061	0.00131452	0.974488	2.29e-20
MAGEA2B	Brown	0.550845	0.00132149	0.975139	1.58e-20
TUBA3C	Brown	0.55083	0.00132199	0.976694	6.25e-21
PHYH	Brown	0.550507	0.00133245	0.98628	3.06e-24
BAALC	Brown	0.550406	0.00133575	0.975149	1.57e-20
SMIM2	Brown	0.550361	0.00133723	0.976742	6.07e-21
RGS7BP	Brown	0.550217	0.00134193	0.973208	4.61e-20
OR52K1	Brown	0.550195	0.00134264	0.97008	2.24e-19
KMO	Brown	0.54967	0.00135996	0.974024	2.96e-20
SLC27A6	Brown	0.549487	0.00136603	0.966311	1.22e-18
RAX2	Brown	0.549248	0.00137398	0.976792	5.88e-21
ANKRD7	Brown	0.54907	0.00137996	0.979985	7.02e-22
PPP6R3	Brown	0.547226	0.00144308	0.939988	4.46e-15
TEX33	Brown	0.546912	0.00145407	0.973352	4.27e-20
RFPL4A	Brown	0.54683	0.00145694	0.963753	3.48e-18
HTR3B	Brown	0.546415	0.00147159	0.977914	2.89e-21
FXYD1	Brown	0.546087	0.00148329	0.865728	3.22e-10
FSTL5	Brown	0.545162	0.00151667	0.920727	2.23e-13
NGFR	Brown	0.54486	0.00152773	0.975886	1.02e-20
ASB15	Brown	0.544686	0.0015341	0.965981	1.41e-18
ZNF257	Brown	0.544263	0.00154976	0.958383	2.49e-17
MAB21L3	Brown	0.543039	0.00159579	0.953743	1.12e-16
CCKAR	Brown	0.5428	0.00160493	0.952971	1.42e-16
TESMIN	Brown	0.541622	0.00165058	0.96292	4.81e-18
MCHR2	Brown	0.541481	0.00165611	0.980653	4.31e-22
XAGE2	Brown	0.541087	0.00167168	0.97377	3.4e-20
SSX4	Brown	0.540658	0.00168875	0.977762	3.19e-21
OR2C1	Brown	0.540416	0.00169846	0.971507	1.11e-19
KRT76	Brown	0.538538	0.00177548	0.945555	1.13e-15
DDIT4L	Brown	0.538101	0.00179383	0.964835	2.26e-18
XPNPEP3	Brown	0.537765	0.00180805	0.816764	2.1e-08
DUXA	Brown	0.53756	0.00181677	0.947318	7.08e-16
SNX31	Brown	0.5375	0.00181934	0.976732	6.11e-21
CDH18	Brown	0.537241	0.00183043	0.907321	1.97e-12
SPATA16	Brown	0.537158	0.001834	0.947138	7.43e-16
APOD	Brown	0.535994	0.00188464	0.854558	9.52e-10
KMT5B	Brown	0.533943	0.00197686	0.961308	8.82e-18
DACH2	Brown	0.533697	0.00198816	0.927077	6.92e-14
TRIM48	Brown	0.533087	0.00201647	0.959994	1.42e-17
PENK	Brown	0.53154	0.00208983	0.929962	3.93e-14
OR5T2	Brown	0.531125	0.0021099	0.949814	3.56e-16
MYCN	Brown	0.530075	0.00216141	0.950058	3.32e-16
CCNA1	Brown	0.529349	0.00219768	0.955813	5.84e-17
CSAG2	Brown	0.528682	0.00223145	0.958954	2.05e-17
GUCA1B	Brown	0.526922	0.00232277	0.957303	3.58e-17
PATL2	Brown	0.526351	0.0023531	0.981729	1.89e-22
ANO1	Brown	0.525578	0.00239468	0.96827	5.2e-19
NLRP4	Brown	0.524935	0.00242972	0.93882	5.86e-15
CADM1	Brown	0.52415	0.00247313	0.903675	3.36e-12
PON1	Brown	0.523351	0.00251804	0.931967	2.61e-14
CCDC197	Brown	0.523092	0.00253273	0.939894	4.56e-15
CHKA	Brown	0.522509	0.00256609	0.923799	1.28e-13
AZIN1	Brown	0.521559	0.00262129	0.901087	4.85e-12
SERHL2	Brown	0.521387	0.00263138	0.919299	2.86e-13
LRBA	Brown	0.520553	0.0026808	0.895093	1.09e-11
HES2	Brown	0.520298	0.00269606	0.963718	3.53e-18
BMX	Brown	0.520244	0.00269932	0.959035	1.99e-17
RAB30	Brown	0.519717	0.00273114	0.871378	1.79e-10
TMLHE	Brown	0.519509	0.00274381	0.912308	9.11e-13
STYXL2	Brown	0.519264	0.00275879	0.822179	1.41e-08
GABRR1	Brown	0.518334	0.00281631	0.955439	6.58e-17
DDX17	Brown	0.515273	0.00301286	0.921973	1.79e-13
LAMTOR3	Brown	0.51084	0.00331849	0.852842	1.12e-09
SORCS2	Brown	0.509891	0.00338725	0.835916	4.82e-09
TMEM114	Brown	0.509794	0.00339437	0.854844	9.27e-10
PHF8	Brown	0.508158	0.00351606	0.884227	4.25e-11
KCNE1B	Brown	0.506863	0.00361507	0.870433	1.98e-10
ABHD12B	Brown	0.506015	0.00368113	0.91207	9.46e-13
BICD1	Brown	0.505845	0.00369451	0.80873	3.7e-08
CEP85L	Brown	0.505065	0.00375646	0.948828	4.69e-16
LYG2	Brown	0.504958	0.00376499	0.922261	1.7e-13
MYOT	Brown	0.504498	0.003802	0.960346	1.25e-17
OR2B3	Brown	0.503033	0.00392194	0.894154	1.24e-11
DNAL4	Brown	0.502916	0.00393166	0.899765	5.83e-12
ZNF282	Brown	0.501773	0.00402769	0.88553	3.64e-11
TMEM184B	Brown	0.501199	0.00407672	0.943144	2.08e-15
OR11H6	Brown	0.500795	0.00411147	0.903044	3.68e-12
Strep, Streptococcus; GS, gene significance; MM, module membership.
